# Supplementary material
Source: MDPI journal article supplement (https://www.mdpi.com/2673-6497/3/4/42)
Supplement: s1 [file s1]

## Article

# Supplementary Material for “Comparing Polyphosphate and Orthophosphate Treatments of Solution-Precipitated Aragonite Powders”

Boyang Gao<sup>1</sup> and Kristin M. Poduska<sup>1,2\*</sup>

<sup>1</sup> Chemistry Department, Memorial University of Newfoundland and Labrador, St. John's, NL A1B 3X7, Canada

<sup>2</sup> Physics & Physical Oceanography Department, Memorial University of Newfoundland and Labrador, St. John's, NL A1B 3X7, Canada

\* Correspondence: kris@mun.ca

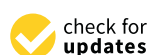

Citation: Gao, B.; Poduska, K. M.

Comparing Polyphosphate and Orthophosphate Treatments of Solution-Precipitated Aragonite Powders. *Solids* **2022**, *3*, S1–S4.

<https://doi.org/10.3390/solids3040042>

Received: 13 October 2022

Accepted: 18 November 2022

Published: 16 December 2022

**Publisher's Note:** MDPI stays neutral with regard to jurisdictional claims in published maps and institutional affiliations.

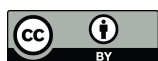

**Copyright:** © 2022 by the authors. Licensee MDPI, Basel, Switzerland. This article is an open access article distributed under the terms and conditions of the Creative Commons Attribution (CC BY) license (<https://creativecommons.org/licenses/by/4.0/>).

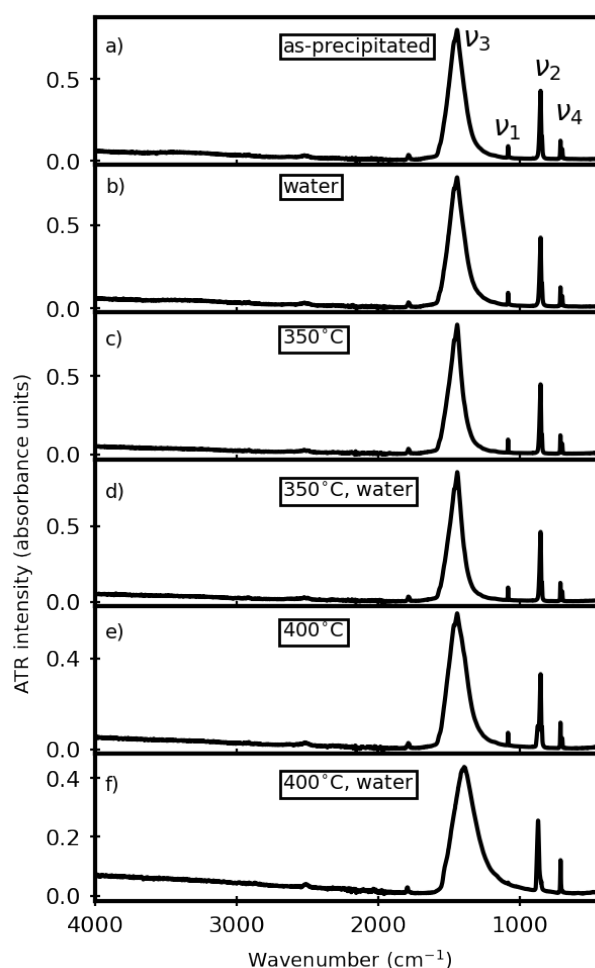

**Figure S1.** Representative full range ATR-FTIR spectra (400–4000 cm<sup>−1</sup>) for (a) as-precipitated powders, (b) as-precipitated powders after 1 week in water, (c) as-precipitated powders + 350°C anneal, (d) as-precipitated powders + 350°C, then 1 week in water, (e) as-precipitated powders + 400°C anneal, and (f) as-precipitated powders + 400°C anneal, then 1 week in water. These data complement Figure 1 in the main text.

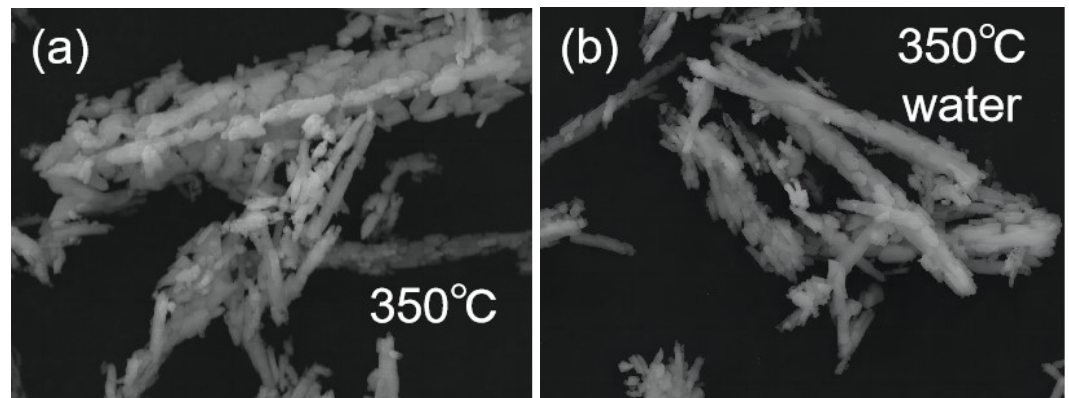

**Figure S2.** Representative SEM images for (a) 350°C annealed, (b) 350°C annealed then exposed to water (1 week). Each image covers a width of 50  $\mu\text{m}$ . These data complement Figure 1 in the main text.

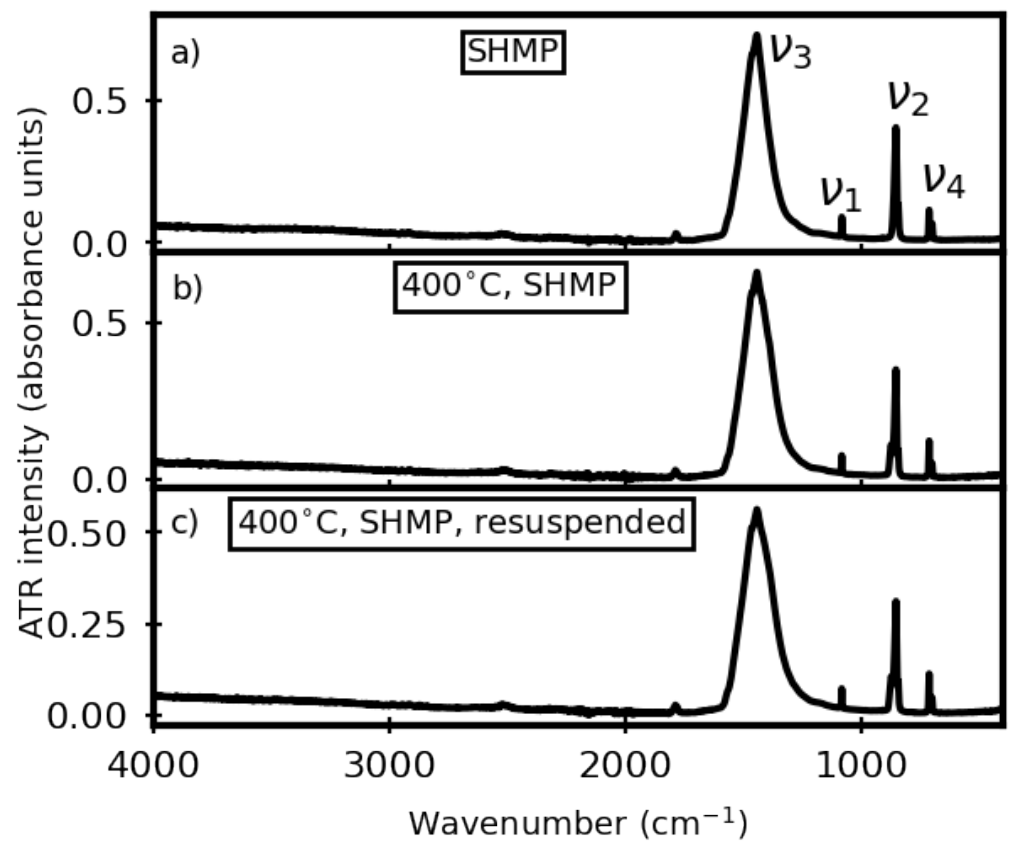

**Figure S3.** Representative full-range ATR-FTIR spectra ( $400\text{--}4000\text{ cm}^{-1}$ ) for polyphosphate-treated powders after 1 week of suspension in 10 mM SHMP. These data complement Figure 2 in the main text.

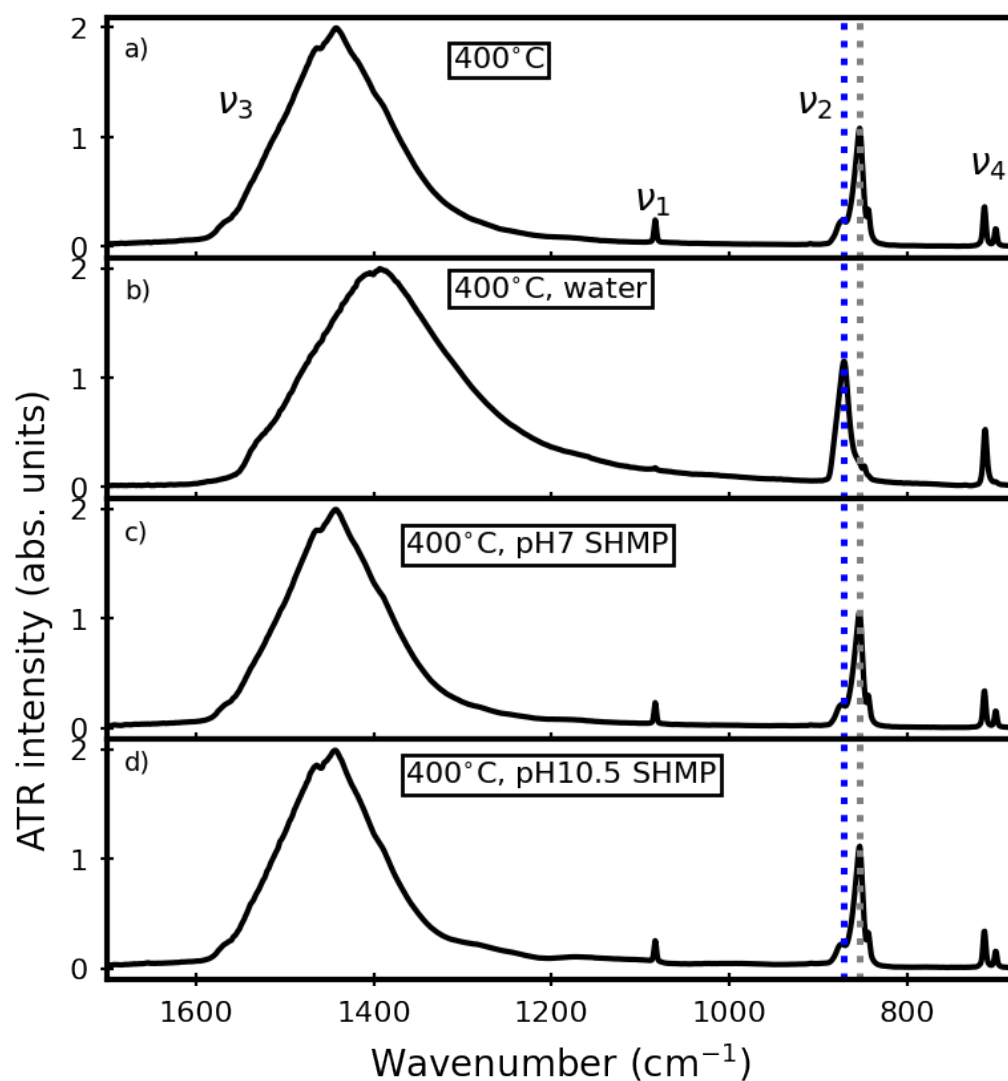

**Figure S4.** Representative ATR-FTIR spectra for (a) as-precipitated powders + 400°C anneal, (b) as-precipitated powders + 400°C anneal, then 1 week in water. (c) as-precipitated powders + 400°C anneal, then 1 week in pH 7 10 mM SHMP. (d) as-precipitated powders + 400°C anneal, then 1 week in pH 10.5 10 mM SHMP. The grey vertical dotted line ( $858\text{ cm}^{-1}$ ) corresponds to the aragonite  $\nu_2$  peak, while the blue vertical dotted line ( $875\text{ cm}^{-1}$ ) shows the calcite  $\nu_2$  peak. These data complement Figure 2 in the main text.

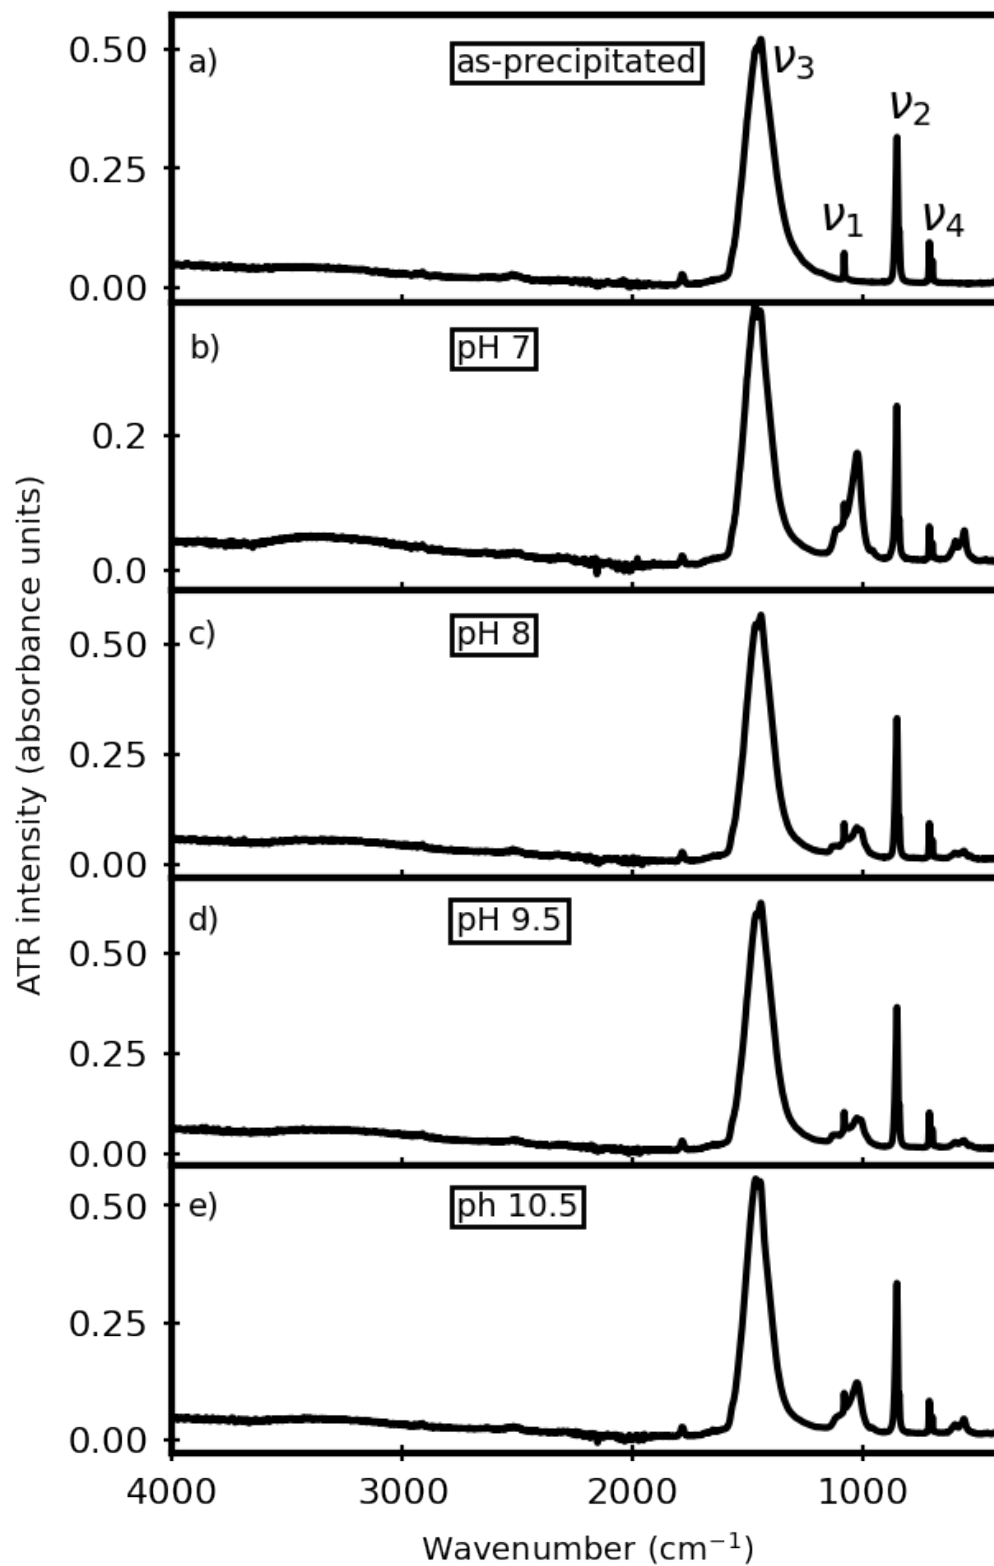

**Figure S5.** Representative full-range ATR-FTIR spectra ( $400\text{--}4000\text{ cm}^{-1}$ ) of as-precipitated powders before (a) and after orthophosphate treatments beginning near-neutral (pH 7, in (b)) to alkaline (pH 10.5, in (e)). These data complement Figure 3 in the main text.
